# Supplementary material
Source: PubMed Central journal article supplement (PMC2254973)
Supplement: JCI0834134sd.pdf [file JCI0834134sd.pdf]

Figure S1. Demonstration of the in vivo specificity of the affinity-purified polyclonal anti-PDI antibody by a competition experiment employing infusion of exogenous bovine PDI. We infused exogenous bovine PDI via the jugular catheter into the mouse circulation, and demonstrated that this circulating PDI had no effect on thrombus development. This is the expected result since exogenous PDI would not be concentrated at the site of thrombus formation, in contrast to endogenous PDI released from endothelial cells and platelets during their activation. Given this observation, we blocked polyclonal anti-PDI antibody-mediated fluorescent labeling of endogenous, thrombus-associated PDI by infusing excess quantities of bovine PDI. This further proves the specificity of the anti-PDI antibodies. Exogenous bovine PDI blocked PDI staining on the thrombus, but the thrombus, as monitored by platelet accumulation, developed normally.

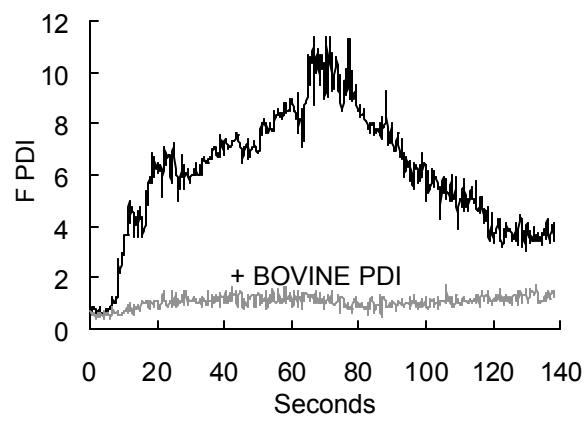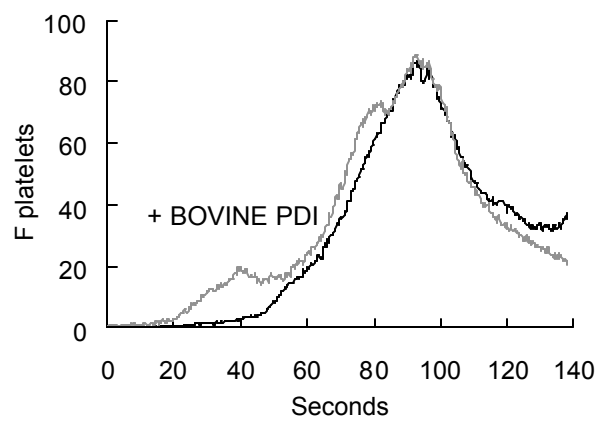

Figure S1
